# Supplementary material
Source: MDPI journal article supplement (https://www.mdpi.com/2073-4352/11/12/1589)
Supplement: s1 [file s1]

# Supplementary Information

## Synthesis, Crystal Structures, and Molecular Properties of three Nitro-Substituted Chalcones

Alam Yair Hidalgo<sup>1</sup>, Manuel Velasco<sup>1</sup>, Eduardo Sánchez-Lara<sup>2</sup>, Abraham Gómez-Rivera<sup>1</sup>, Miguel A. Vilchis-Reyes<sup>1</sup>, Cuauhtémoc Alvarado<sup>1</sup>, Maribel Herrera-Ruiz<sup>3</sup>, Ricardo López-Rodríguez<sup>1</sup>, Nancy Romero-Ceronio<sup>1,\*</sup> and Carlos E. Lobato-García<sup>1</sup>

<sup>1</sup>División Académica de Ciencias Básicas, Universidad Juárez Autónoma de Tabasco, Carretera Cunduacán-Jalpa Km 1, Col. La Esperanza, C.P. 86690 Cunduacán, Tabasco, México

<sup>2</sup>Instituto de Ciencias, Benemérita Universidad Autónoma de Puebla, 18 sur y Av. San Claudio, Col. San Manuel, C.P. 72570 Puebla, México  
§ Currently unaffiliated to Benemérita Universidad Autónoma de Puebla

<sup>3</sup> Centro de Investigación Biomédica del Sur, Instituto Mexicano del Seguro Social, Calle Rep. Argentina #1, C.P. 62780 Xochitepec, Morelos, México

\* Author to whom correspondence should be addressed: nancy.romero@ujat.mx

### Table of Contents

|                                                                                                                                                                           |     |
|---------------------------------------------------------------------------------------------------------------------------------------------------------------------------|-----|
| <b>Figure S1.</b> <sup>1</sup> H NMR (600 MHz, DMSO- <i>d</i> <sub>6</sub> ) of compound <b>1a</b> : ( <i>E</i> )-1,3-bis(2-nitrophenyl)prop-2-en-1-one.....              | S3  |
| <b>Figure S2.</b> DEPTQ NMR (150 MHz, DMSO- <i>d</i> <sub>6</sub> ) of compound <b>1a</b> : ( <i>E</i> )-1,3-bis(2-nitrophenyl)prop-2-en-1-one.....                       | S4  |
| <b>Figure S3.</b> <sup>1</sup> H NMR (600 MHz, DMSO- <i>d</i> <sub>6</sub> ) of compound <b>1b</b> : ( <i>E</i> )-1-(2-nitrophenyl)-3-(3-nitrophenyl)prop-2-en-1-one..... | S5  |
| <b>Figure S4.</b> DEPTQ NMR (150 MHz, DMSO- <i>d</i> <sub>6</sub> ) of compound <b>1b</b> : ( <i>E</i> )-1-(2-nitrophenyl)-3-(3-nitrophenyl)prop-2-en-1-one....           | S6  |
| <b>Figure S5.</b> <sup>1</sup> H NMR (600 MHz, DMSO- <i>d</i> <sub>6</sub> ) of compound <b>1c</b> : ( <i>E</i> )-1-(2-nitrophenyl)-3-(4-nitrophenyl)prop-2-en-1-one..... | S7  |
| <b>Figure S6.</b> DEPTQ NMR (150 MHz, DMSO- <i>d</i> <sub>6</sub> ) of compound <b>1c</b> : ( <i>E</i> )-1-(2-nitrophenyl)-3-(4-nitrophenyl)prop-2-en-1-one....           | S8  |
| <b>Figure S7.</b> FT-IR Spectrum of <b>1a-1c</b> .....                                                                                                                    | S9  |
| <b>Table S1.</b> Assignment of characteristic vibrational frequencies for <b>1a-1c</b> .....                                                                              | S10 |
| <b>Figure S8.</b> A view of the crystal packing down the <i>b</i> axis for compound <b>1a</b> .....                                                                       | S11 |
| <b>Figure S9.</b> A view of the crystal packing down the <i>b</i> axis for compound <b>1b</b> .....                                                                       | S12 |

|                                                                                                                                                                                                                                                                                                           |     |
|-----------------------------------------------------------------------------------------------------------------------------------------------------------------------------------------------------------------------------------------------------------------------------------------------------------|-----|
| <b>Figure S10.</b> A view of the crystal packing down <i>a</i> axis for compound <b>1c</b> .....                                                                                                                                                                                                          | S13 |
| <b>Figure S11.</b> The two-dimensional fingerprint plot of <b>1a</b> , showing $\pi$ - $\pi$ stacking interactions. [ <i>de</i> and <i>di</i> represent the distances from a point on the Hirshfeld surface to the nearest atoms outside (external) and inside (internal) the surface, respectively]..... | S14 |
| <b>Figure S12.</b> The two-dimensional fingerprint plot of <b>1c</b> , showing C-H...O contacts [ <i>de</i> and <i>di</i> represent the distances from a point on the Hirshfeld surface to the nearest atoms outside (external) and inside (internal) the surface, respectively]...S15                    | S15 |
| <b>Table S2.</b> Selected Bond lengths [ $\text{\AA}$ ] and angles [ $^\circ$ ] for <b>1a</b> .....                                                                                                                                                                                                       | S16 |
| <b>Table S3.</b> Selected Bond lengths [ $\text{\AA}$ ] and angles [ $^\circ$ ] for <b>1b</b> .....                                                                                                                                                                                                       | S18 |
| <b>Table S4.</b> Selected Bond lengths [ $\text{\AA}$ ] and angles [ $^\circ$ ] for <b>1c</b> .....                                                                                                                                                                                                       | S20 |
| <b>Table S5.</b> Hydrogen-bond for <b>1a</b> .....                                                                                                                                                                                                                                                        | S22 |
| <b>Table S6.</b> Hydrogen-bond for <b>1b</b> .....                                                                                                                                                                                                                                                        | S22 |
| <b>Table S7.</b> Hydrogen -bonds for <b>1c</b> .....                                                                                                                                                                                                                                                      | S23 |

**Figure S1.**  $^1\text{H}$  NMR (600 MHz,  $\text{DMSO}-d_6$ ) of compound **1a**: (*E*)-1,3-bis(2-nitrophenyl)prop-2-en-1-one.

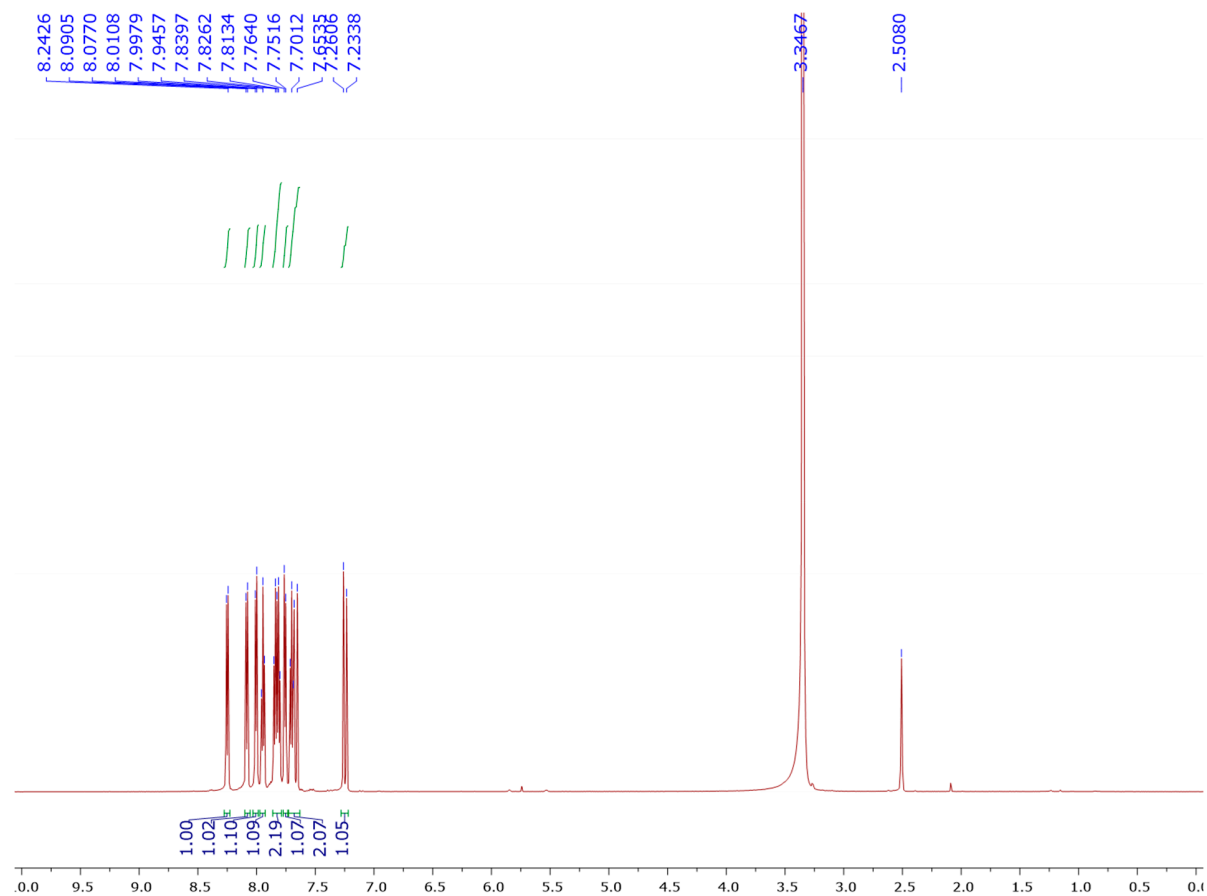

**Figure S2.** DEPTQ NMR (150 MHz, DMSO-*d*<sub>6</sub>) of compound **1a**: (*E*)-1,3-bis(2-nitrophenyl)prop-2-en-1-one.

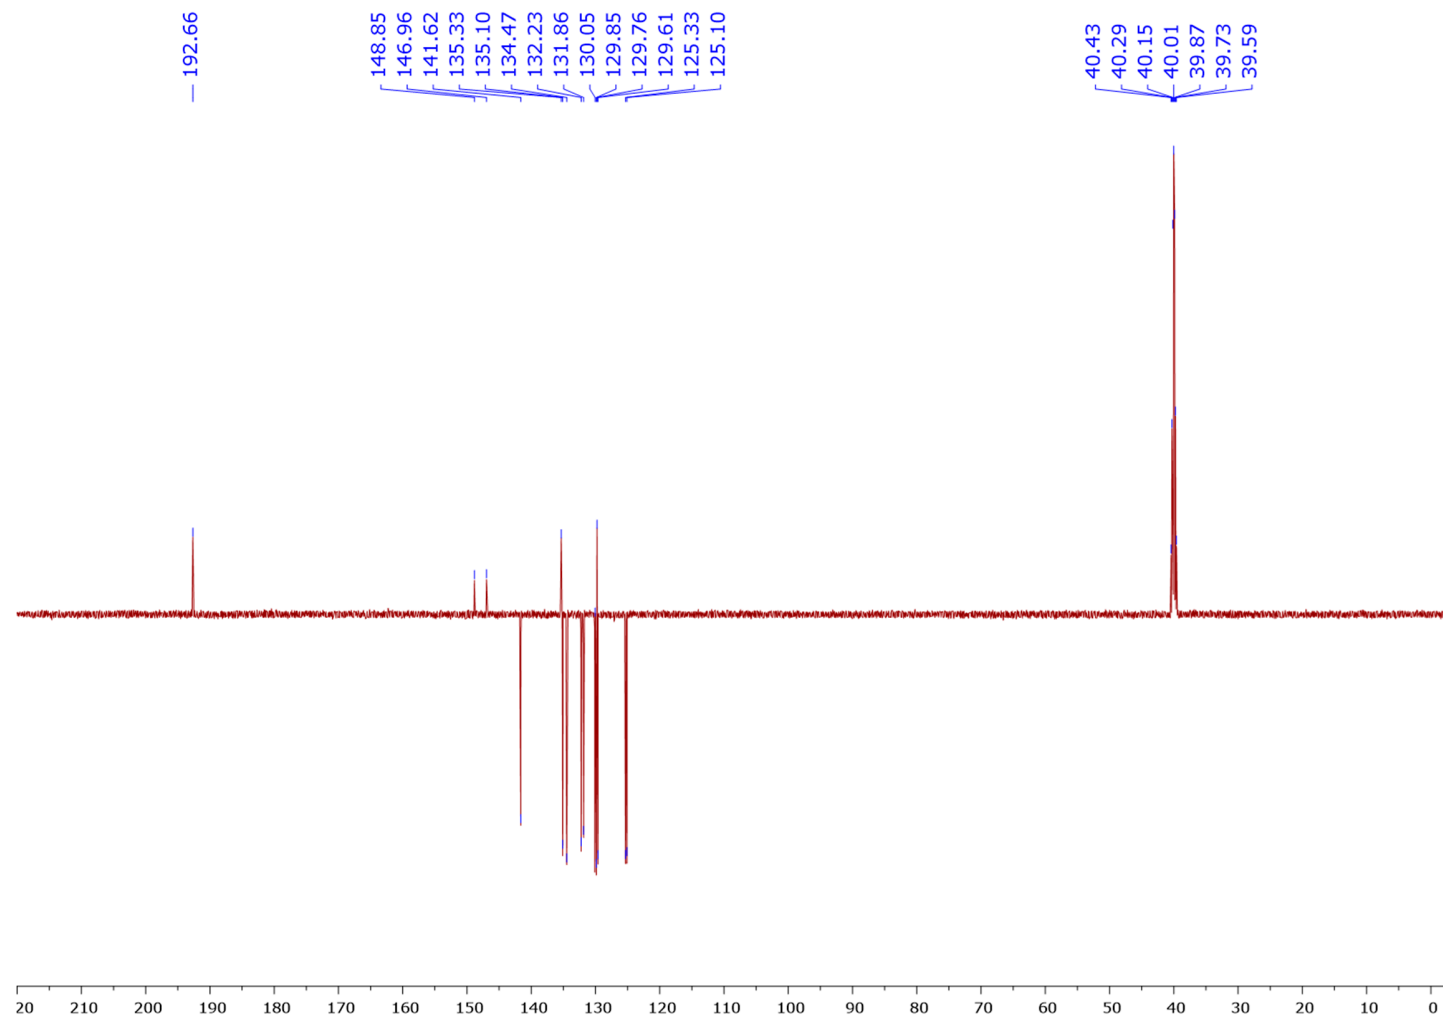

**Figure S3.**  $^1\text{H}$  NMR (600 MHz,  $\text{DMSO-}d_6$ ) of compound **1b**: (*E*)-1-(2-nitrophenyl)-3-(3-nitrophenyl)prop-2-en-1-one.

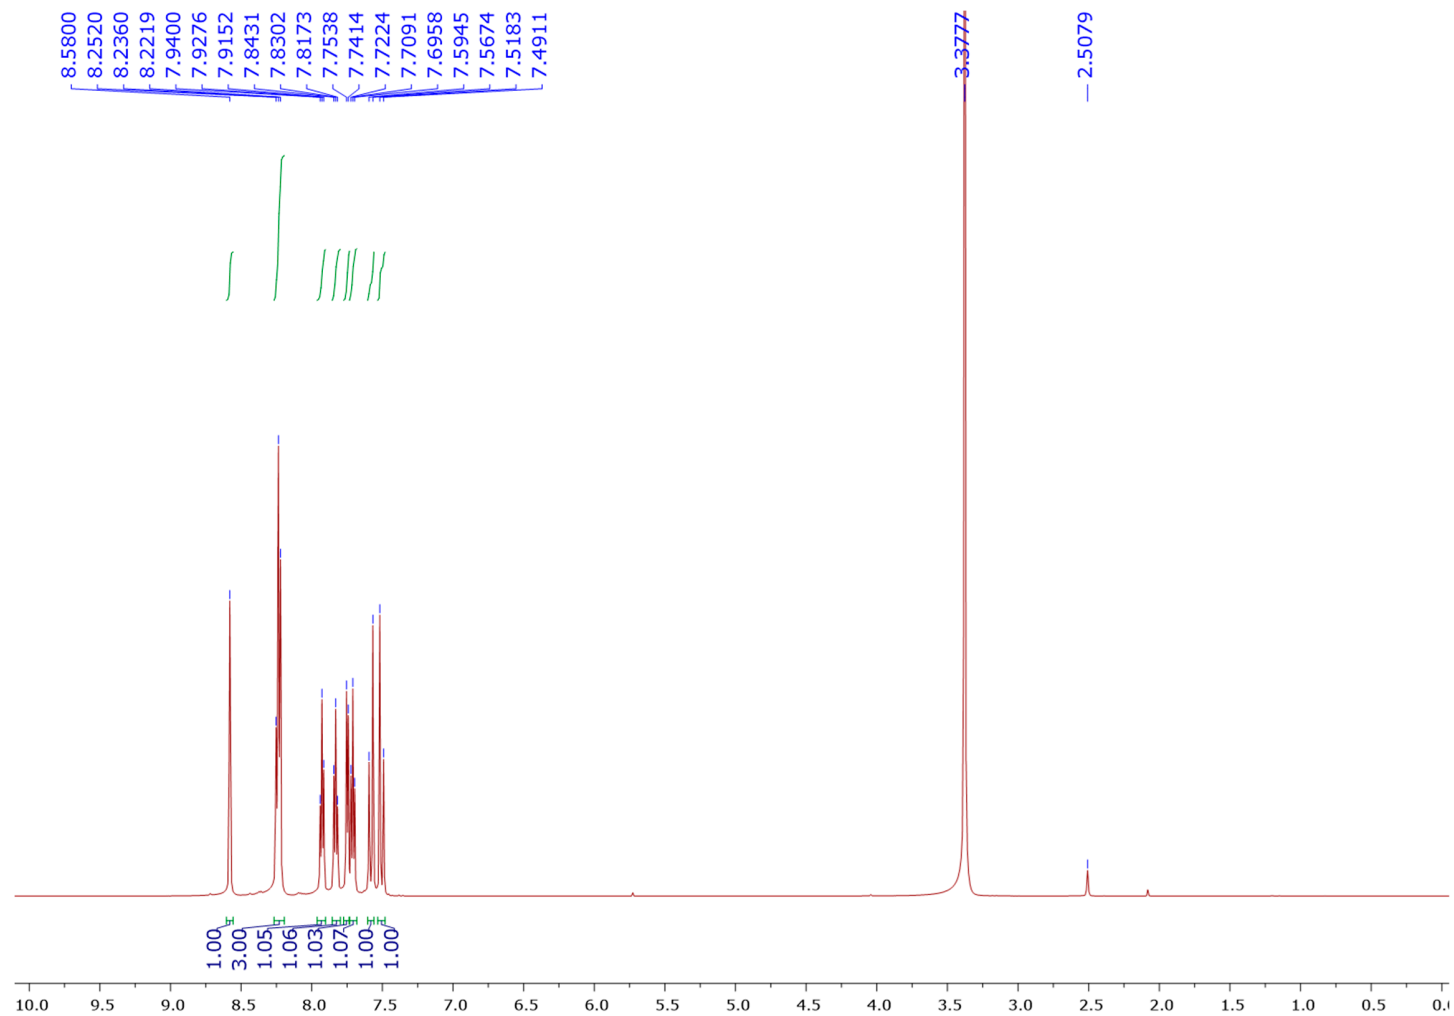

**Figure S4.** DEPTQ NMR (150 MHz, DMSO-*d*<sub>6</sub>) of compound **1b**: (*E*)-1-(2-nitrophenyl)-3-(3-nitrophenyl)prop-2-en-1-one.

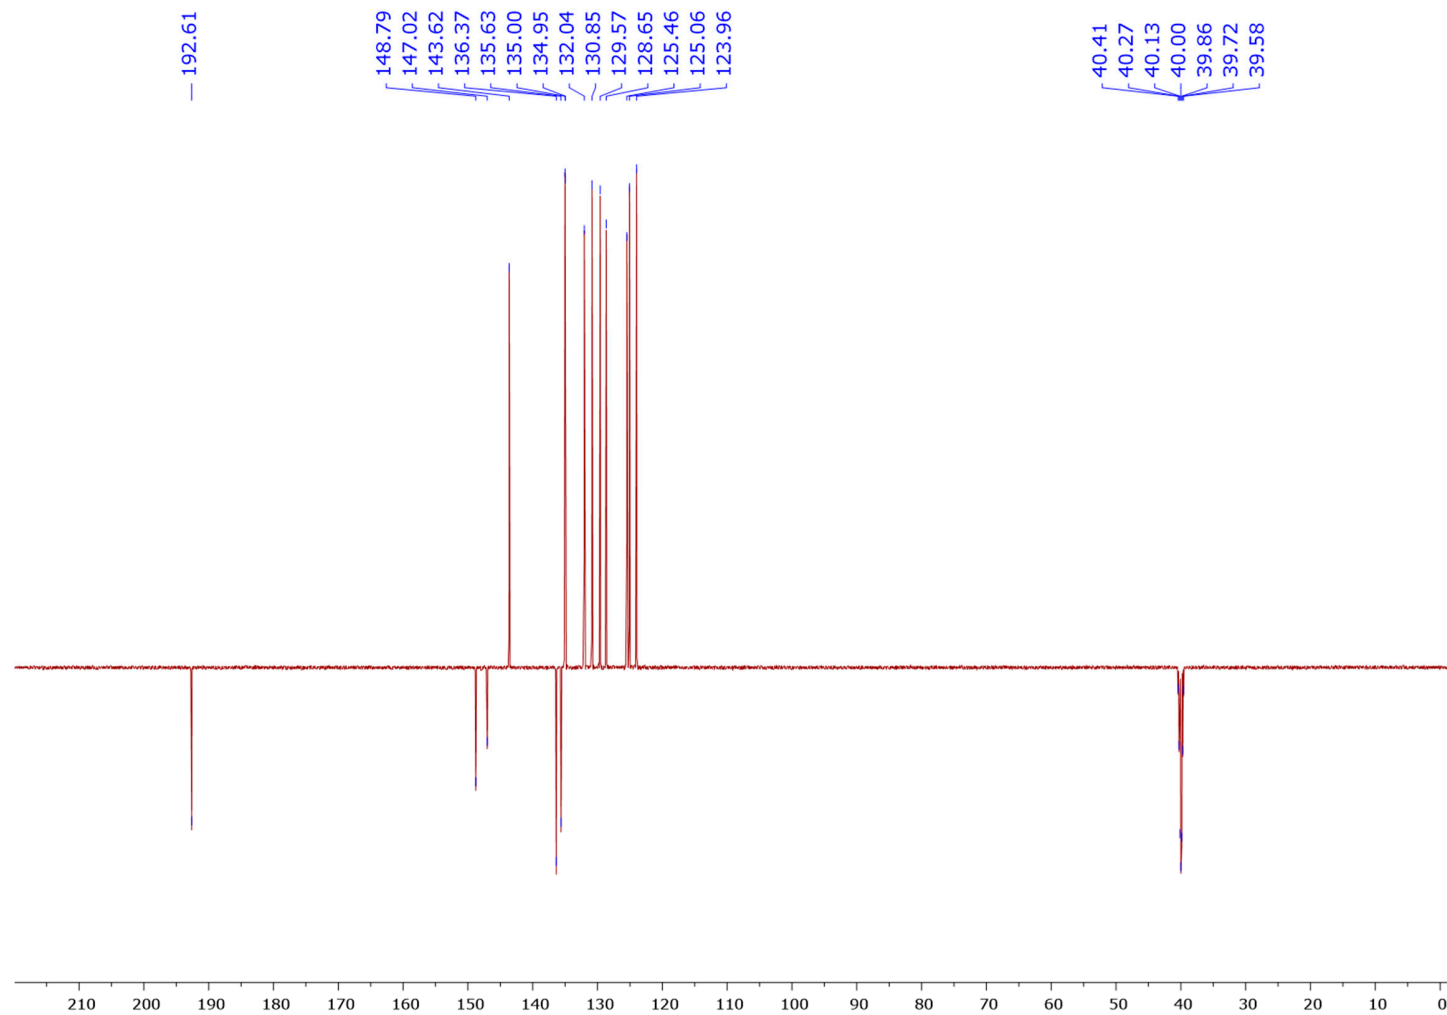

**Figure S5.**  $^1\text{H}$  NMR (600 MHz,  $\text{DMSO}-d_6$ ) of compound **1c**: (*E*)-1-(2-nitrophenyl)-3-(4-nitrophenyl)prop-2-en-1-one.

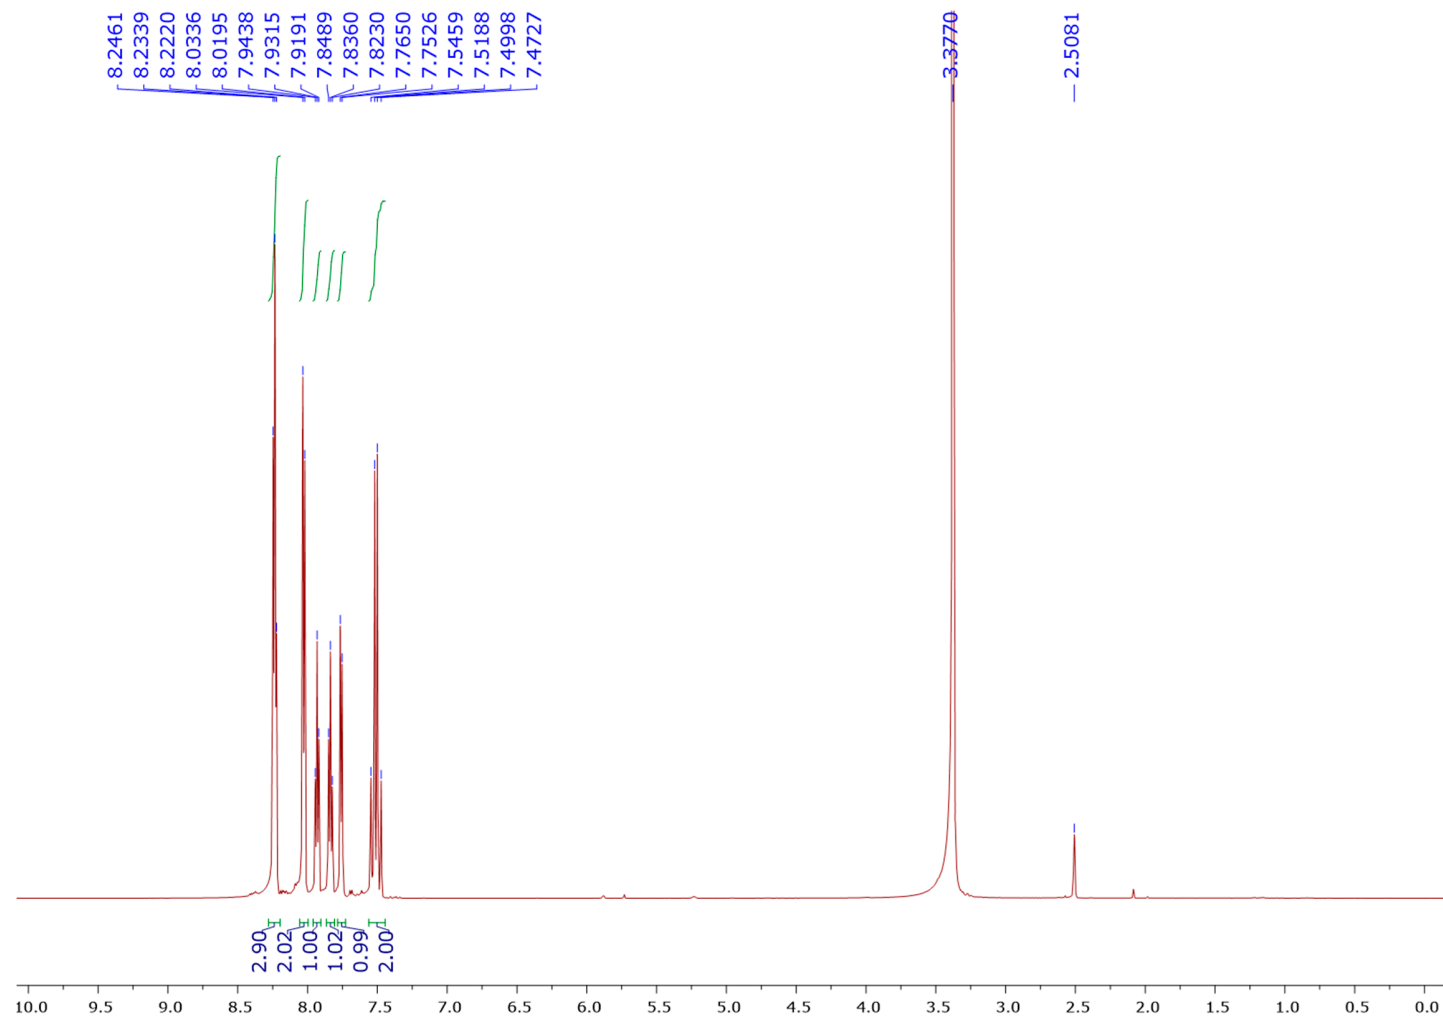

**Figure S6.** DEPTQ NMR (150 MHz, DMSO-*d*<sub>6</sub>) of compound **1c**: (*E*)-1-(2-nitrophenyl)-3-(4-nitrophenyl)prop-2-en-1-one.

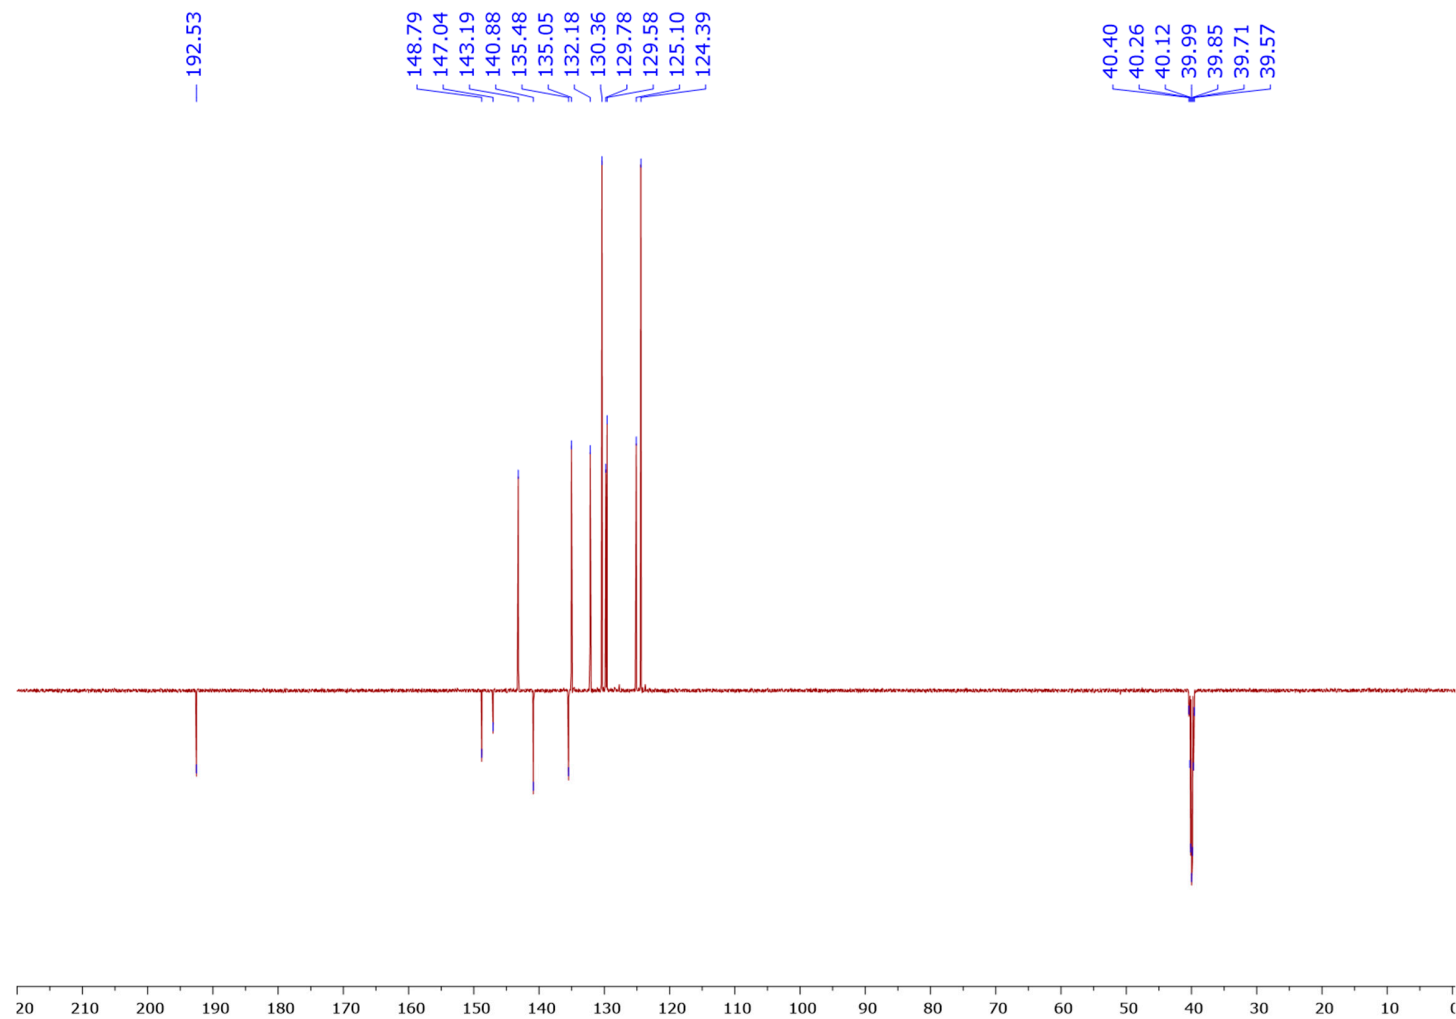



Figure S7. FT-IR Spectrum of 1a-1c.

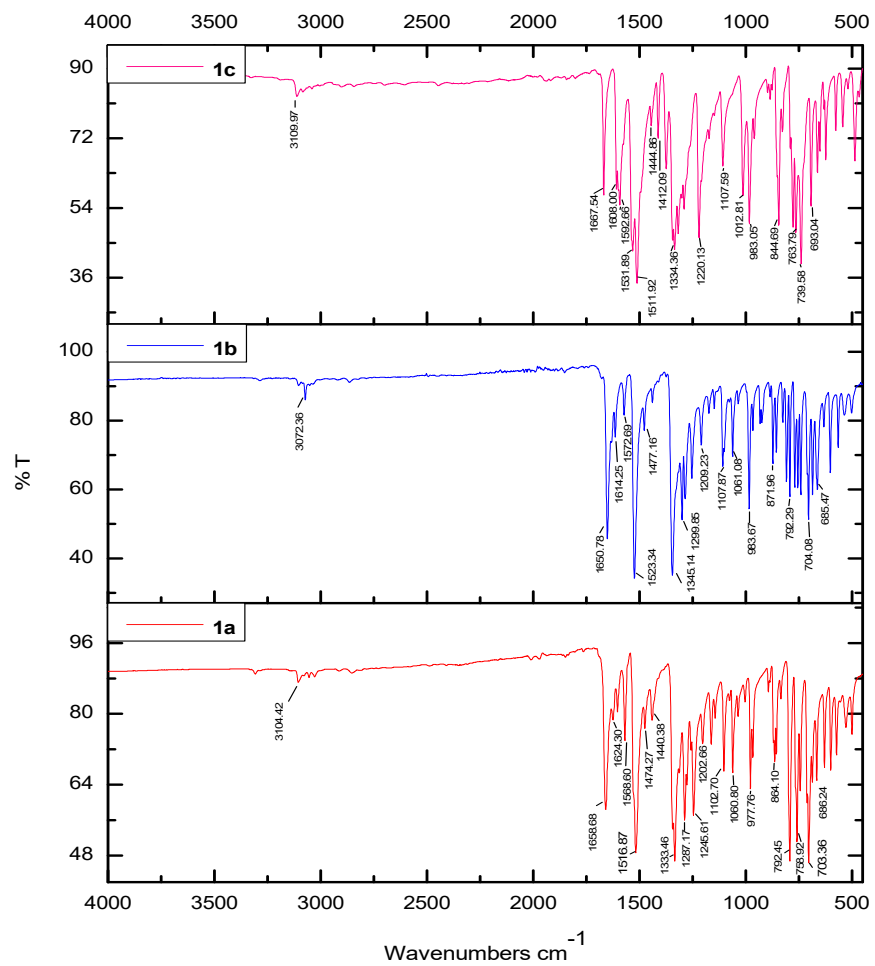

**Tabla S1.** Assignment of characteristic vibrational frequencies for **1a-1c**.

| Assignment                                                | <b>1a</b> | <b>1b</b> | <b>1c</b> |
|-----------------------------------------------------------|-----------|-----------|-----------|
| Aromatic C-H stretching vibration                         | 3104      | 3072      | 3109      |
| C=O stretching vibration                                  | 1658      | 1650      | 1667      |
| C = C stretching vibration                                | 1516      | 1523      | 1511      |
| N-O asymmetric stretch vibration of NO <sub>2</sub> group | 1568      | 1572      | 1592      |
| N-O symmetric stretch vibration of NO <sub>2</sub> group  | 1333      | 1345      | 1334      |
| C-H in plane deformation of CH = CH                       | 1202      | 1209      | 1220      |
| C = C <i>trans</i>                                        | 977       | 983       | 983       |

**Figure S8.** A view of the crystal packing down the *b* axis for compound **1a**.

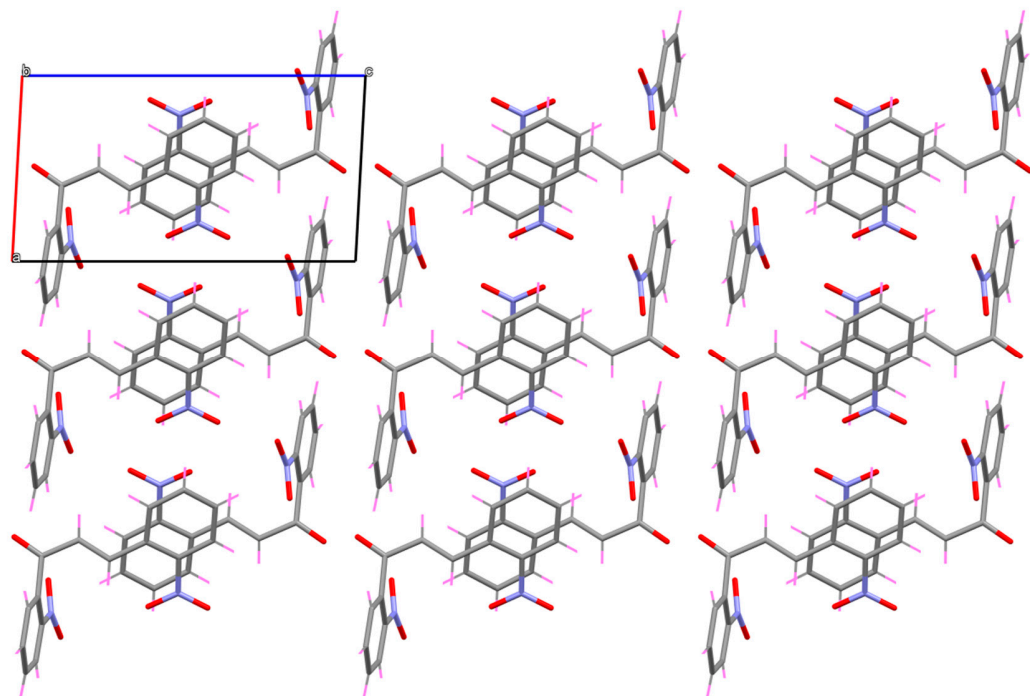

**Figure S9.** A view of the crystal packing down the *b* axis for compound **1b**.

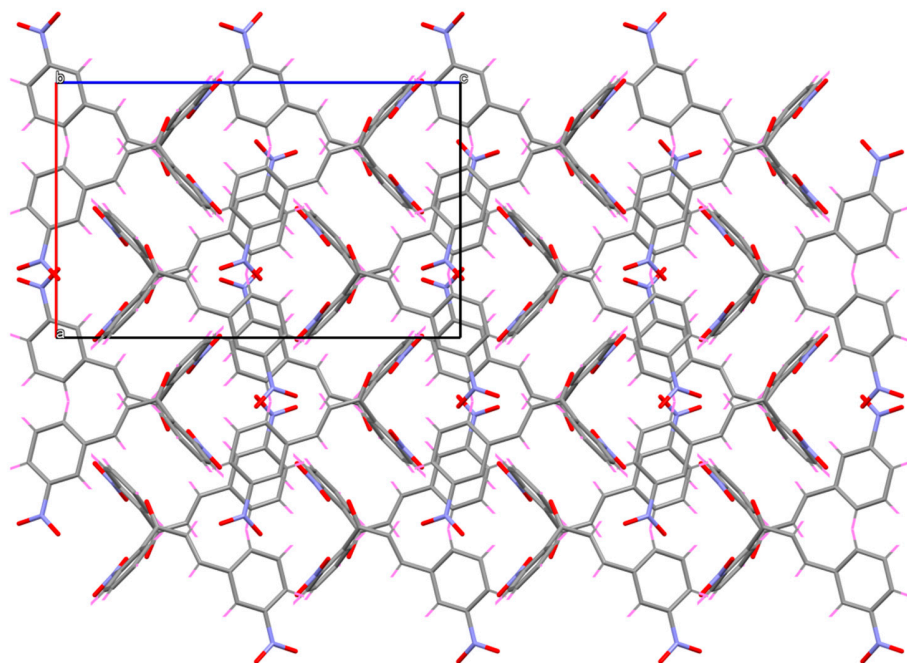

**Figure S10.** A view of the crystal packing down the *a* axis for compound **1c**.

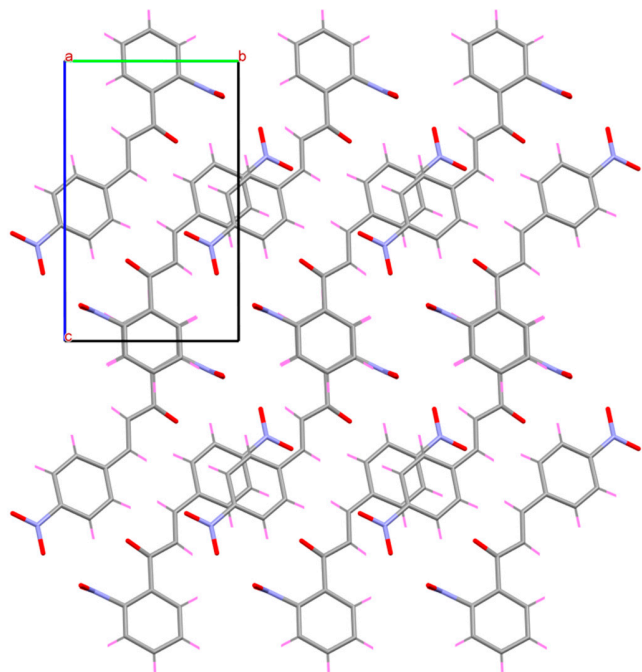

**Figure S11.** 2D fingerprint plot of **1a**, showing  $\pi$ - $\pi$  stacking contacts [ $de$  and  $di$  represent the distances from a point on the Hirshfeld surface to the nearest atoms outside (external) and inside (internal) the surface, respectively].

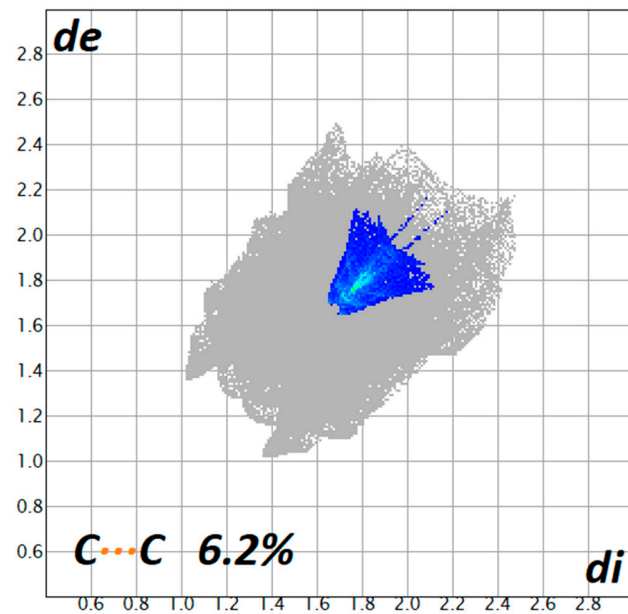

**Figure S12.** 2D fingerprint plot of **1c**, showing C-H $\cdots$ O contacts [*de* and *di* represent the distances from a point on the Hirshfeld surface to the nearest atoms outside (external) and inside (internal) the surface, respectively].

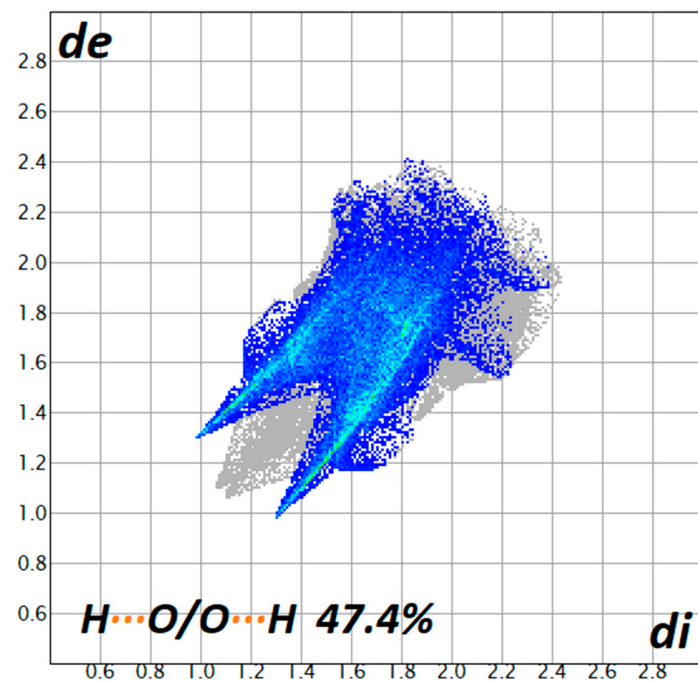

**Table S2.** Selected Bond lengths [ $\text{\AA}$ ] and angles [ $^\circ$ ] for **1a**

---

|                |            |
|----------------|------------|
| O(1)-N(1)      | 1.2273(12) |
| O(2)-N(1)      | 1.2311(11) |
| O(3)-N(2)      | 1.2290(12) |
| O(4)-N(2)      | 1.2291(12) |
| N(1)-C(2')     | 1.4690(13) |
| N(2)-C(2)      | 1.4715(13) |
| C(1)-C(9)      | 1.4760(14) |
| C(2)-C(3)      | 1.3894(14) |
| C(3)-C(4)      | 1.3834(15) |
| C(4)-C(5)      | 1.3871(16) |
| C(5)-C(6)      | 1.3903(15) |
| C(7)-O(7)      | 1.2179(12) |
| C(7)-C(8)      | 1.4728(14) |
| C(7)-C(1')     | 1.5125(13) |
| C(8)-C(9)      | 1.3369(14) |
| C(1')-C(6')    | 1.3957(14) |
| C(1')-C(2')    | 1.3978(14) |
| C(2')-C(3')    | 1.3881(13) |
| C(3')-C(4')    | 1.3868(15) |
| C(5')-C(6')    | 1.3928(14) |
| O(1)-N(1)-O(2) | 123.38(9)  |



|                   |            |
|-------------------|------------|
| O(1)-N(1)-C(2')   | 118.56(9)  |
| O(2)-N(1)-C(2')   | 118.05(8)  |
| O(3)-N(2)-O(4)    | 123.18(9)  |
| O(3)-N(2)-C(2)    | 118.66(9)  |
| O(4)-N(2)-C(2)    | 118.15(9)  |
| C(6)-C(1)-C(2)    | 116.05(9)  |
| C(6)-C(1)-C(9)    | 118.38(9)  |
| C(2)-C(1)-C(9)    | 125.51(9)  |
| C(3)-C(2)-C(1)    | 123.00(9)  |
| C(3)-C(2)-N(2)    | 116.04(9)  |
| C(1)-C(2)-N(2)    | 120.94(9)  |
| C(4)-C(3)-C(2)    | 119.13(10) |
| C(3)-C(4)-C(5)    | 119.71(10) |
| C(4)-C(5)-C(6)    | 120.56(10) |
| C(5)-C(6)-C(1)    | 121.53(10) |
| O(7)-C(7)-C(8)    | 121.72(9)  |
| O(7)-C(7)-C(1')   | 119.20(9)  |
| C(8)-C(7)-C(1')   | 118.90(8)  |
| C(9)-C(8)-C(7)    | 123.40(9)  |
| C(8)-C(9)-C(1)    | 122.21(9)  |
| C(6')-C(1')-C(2') | 117.44(9)  |
| C(6')-C(1')-C(7)  | 117.40(9)  |
| C(2')-C(1')-C(7)  | 125.12(9)  |
| C(3')-C(2')-C(1') | 122.62(10) |

|                   |            |
|-------------------|------------|
| C(3')-C(2')-N(1)  | 117.52(9)  |
| C(1')-C(2')-N(1)  | 119.77(9)  |
| C(4')-C(3')-C(2') | 118.72(10) |
| C(3')-C(4')-C(5') | 120.10(9)  |

---

**Table S3.** Selected Bond lengths [ $\text{\AA}$ ] and angles [ $^\circ$ ] for **1b**

---

|             |            |
|-------------|------------|
| O(1)-N(1)   | 1.2182(19) |
| O(2)-N(1)   | 1.2135(19) |
| O(3)-N(2)   | 1.219(2)   |
| O(4)-N(2)   | 1.2216(19) |
| N(1)-C(2')  | 1.469(2)   |
| N(2)-C(3)   | 1.469(2)   |
| C(1)-C(9)   | 1.465(2)   |
| C(2)-C(3)   | 1.378(2)   |
| C(1')-C(7)  | 1.510(2)   |
| C(2')-C(3') | 1.380(2)   |
| C(3')-C(4') | 1.366(3)   |
| C(7)-O(7)   | 1.2177(18) |
| C(7)-C(8)   | 1.452(2)   |

|                   |            |
|-------------------|------------|
| C(8)-C(9)         | 1.324(2)   |
| O(2)-N(1)-O(1)    | 123.57(16) |
| O(2)-N(1)-C(2')   | 118.24(15) |
| O(1)-N(1)-C(2')   | 118.19(16) |
| O(3)-N(2)-O(4)    | 123.03(17) |
| O(3)-N(2)-C(3)    | 118.46(14) |
| O(4)-N(2)-C(3)    | 118.50(17) |
| C(6)-C(1)-C(9)    | 122.37(14) |
| C(3)-C(2)-C(1)    | 119.04(14) |
| C(4)-C(3)-C(2)    | 122.77(15) |
| C(4)-C(3)-N(2)    | 118.47(15) |
| C(2)-C(3)-N(2)    | 118.75(15) |
| C(3)-C(4)-C(5)    | 117.92(16) |
| C(6)-C(5)-C(4)    | 120.83(16) |
| C(5)-C(6)-C(1)    | 120.83(16) |
| C(2')-C(1')-C(6') | 116.89(15) |
| C(2')-C(1')-C(7)  | 125.45(15) |
| C(6')-C(1')-C(7)  | 117.62(15) |
| C(3')-C(2')-C(1') | 122.82(16) |
| C(3')-C(2')-N(1)  | 117.40(15) |
| C(1')-C(2')-N(1)  | 119.75(14) |
| O(7)-C(7)-C(1')   | 119.33(15) |
| C(8)-C(7)-C(1')   | 119.26(13) |

---

**Table S4.** Selected Bond lengths [Å] and angles [°] for **1c**

---

|                 |            |
|-----------------|------------|
| O(1)-N(1)       | 1.199(2)   |
| O(2)-N(1)       | 1.206(2)   |
| O(3)-N(2)       | 1.2181(18) |
| O(4)-N(2)       | 1.2144(19) |
| N(1)-C(2')      | 1.4759(19) |
| N(2)-C(4)       | 1.473(2)   |
| C(1)-C(9)       | 1.466(2)   |
| C(7)-O(7B)      | 1.214(7)   |
| C(7)-O(7A)      | 1.251(12)  |
| C(7)-C(8)       | 1.479(2)   |
| C(7)-C(1')      | 1.491(2)   |
| C(8)-C(9)       | 1.321(2)   |
| O(1)-N(1)-O(2)  | 123.49(16) |
| O(1)-N(1)-C(2') | 118.10(15) |
| O(2)-N(1)-C(2') | 118.30(16) |
| O(4)-N(2)-O(3)  | 123.76(16) |
| O(4)-N(2)-C(4)  | 118.56(15) |
| O(3)-N(2)-C(4)  | 117.68(16) |
| C(6)-C(1)-C(2)  | 118.33(14) |
| C(6)-C(1)-C(9)  | 118.80(14) |
| C(2)-C(1)-C(9)  | 122.83(14) |
| C(3)-C(2)-C(1)  | 120.63(15) |

|                   |            |
|-------------------|------------|
| C(4)-C(3)-C(2)    | 119.21(13) |
| C(3)-C(4)-C(5)    | 122.21(14) |
| C(3)-C(4)-N(2)    | 119.74(14) |
| C(5)-C(4)-N(2)    | 118.03(15) |
| C(4)-C(5)-C(6)    | 118.04(15) |
| C(5)-C(6)-C(1)    | 121.57(14) |
| O(7B)-C(7)-C(8)   | 121.7(4)   |
| O(7A)-C(7)-C(8)   | 118.1(9)   |
| O(7B)-C(7)-C(1')  | 117.4(5)   |
| O(7A)-C(7)-C(1')  | 120.0(7)   |
| C(8)-C(7)-C(1')   | 119.85(13) |
| C(9)-C(8)-C(7)    | 120.50(15) |
| C(8)-C(9)-C(1)    | 128.26(15) |
| C(6')-C(1')-C(2') | 116.22(14) |
| C(6')-C(1')-C(7)  | 122.56(13) |
| C(2')-C(1')-C(7)  | 121.03(13) |
| C(3')-C(2')-C(1') | 123.05(14) |
| C(3')-C(2')-N(1)  | 116.07(13) |
| C(4')-C(5')-C(6') | 120.14(15) |
| C(5')-C(6')-C(1') | 121.58(14) |

---

**Table S5.** Hydrogen-bond geometry for **1a** [ $\text{\AA}$  and  $^\circ$ ].

| D-H...A    | d(D-H) | d(H...A) | d(D...A)   | $\angle(\text{DHA})$ |
|------------|--------|----------|------------|----------------------|
| C9-H9...O3 | 0.95   | 2.33     | 2.672 (13) | 100.3                |

**Table S6.** Hydrogen-bond geometry for **1b** [ $\text{\AA}$  and  $^\circ$ ].

| D-H...A    | d(D-H) | d(H...A) | d(D...A) | $\angle(\text{DHA})$ |
|------------|--------|----------|----------|----------------------|
| C8-H8...O1 | 0.93   | 2.56     | 3.37(2)  | 146.4                |
| C2-H2...O7 | 0.93   | 2.56     | 3.37(2)  | 145.3                |

**Table S7.** Hydrogen-bond geometry for **1c** [Å and °].

| D-H...A           | d(D-H) | d(H...A) | d(D...A) | <(DHA) |
|-------------------|--------|----------|----------|--------|
| C(3)-H(3)...O(7A) | 0.93   | 2.40     | 3.103(4) | 102.7  |
| C9-H9...O7B       | 0.93   | 2.46     | 2.798(9) | 101.7  |
